# Supplementary material for: Pyrrole-Containing Alkaloids from a Marine-Derived Actinobacterium Streptomyces zhaozhouensis and Their Antimicrobial and Cytotoxic Activities
Source: MDPI journal article supplement (doi:10.3390/md21030167), 2023-03-06
Supplement: s1 [file s1]

# Pyrrole-Containing Alkaloids from a Marine-Derived Actinobacterium *Streptomyces zhaozhouensis* and Their Antimicrobial and Cytotoxic Activities

## Contents

|                                                                                                                  |    |
|------------------------------------------------------------------------------------------------------------------|----|
| <b>Figure S1.</b> Structures of <b>1-6</b> isolated from <i>Streptomyces zhaozhouensis</i> 208DD-064.....        | 2  |
| <b>Figure S2.</b> Comparison of chemical shifts between the new compounds ( <b>1, 2</b> ) and known analogs..... | 3  |
| <b>Figure S3.</b> IR spectrum of <b>1</b> .....                                                                  | 4  |
| <b>Figure S4.</b> HRESMS data of <b>1</b> .....                                                                  | 5  |
| <b>Figure S5.</b> <sup>1</sup> H NMR spectrum of <b>1</b> .....                                                  | 6  |
| <b>Figure S6.</b> <sup>13</sup> C NMR spectrum of <b>1</b> .....                                                 | 6  |
| <b>Figure S7.</b> HSQC spectrum of <b>1</b> .....                                                                | 7  |
| <b>Figure S8.</b> <sup>1</sup> H- <sup>1</sup> H COSY spectrum of <b>1</b> .....                                 | 8  |
| <b>Figure S9.</b> HMBC spectrum of <b>1</b> .....                                                                | 9  |
| <b>Figure S10.</b> IR spectrum of <b>2</b> .....                                                                 | 10 |
| <b>Figure S11.</b> HRESIMS data of <b>2</b> .....                                                                | 11 |
| <b>Figure S12.</b> <sup>1</sup> H NMR spectrum of <b>2</b> .....                                                 | 12 |
| <b>Figure S13.</b> <sup>13</sup> C NMR spectrum of <b>2</b> .....                                                | 12 |
| <b>Figure S14.</b> HSQC spectrum of <b>2</b> .....                                                               | 13 |
| <b>Figure S15.</b> <sup>1</sup> H- <sup>1</sup> H COSY spectrum of <b>2</b> .....                                | 14 |
| <b>Figure S16.</b> HMBC spectrum of <b>2</b> .....                                                               | 15 |
| <b>Figure S17.</b> LRESIMS data of <b>3</b> .....                                                                | 16 |
| <b>Figure S18.</b> <sup>1</sup> H NMR spectrum of <b>3</b> .....                                                 | 16 |
| <b>Figure S19.</b> LRESIMS data of <b>4</b> .....                                                                | 17 |
| <b>Figure S20.</b> <sup>1</sup> H NMR spectrum of <b>4</b> .....                                                 | 17 |
| <b>Figure S21.</b> LRESIMS data of <b>5</b> .....                                                                | 18 |
| <b>Figure S22.</b> <sup>1</sup> H NMR spectrum of <b>5</b> .....                                                 | 18 |
| <b>Figure S23.</b> LRESIMS data of <b>6</b> .....                                                                | 19 |
| <b>Figure S24.</b> <sup>1</sup> H NMR spectrum of <b>6</b> .....                                                 | 19 |
| <b>Table S1.</b> Results of the cytotoxicity test of <b>1,3</b> and <b>5</b> .....                               | 20 |

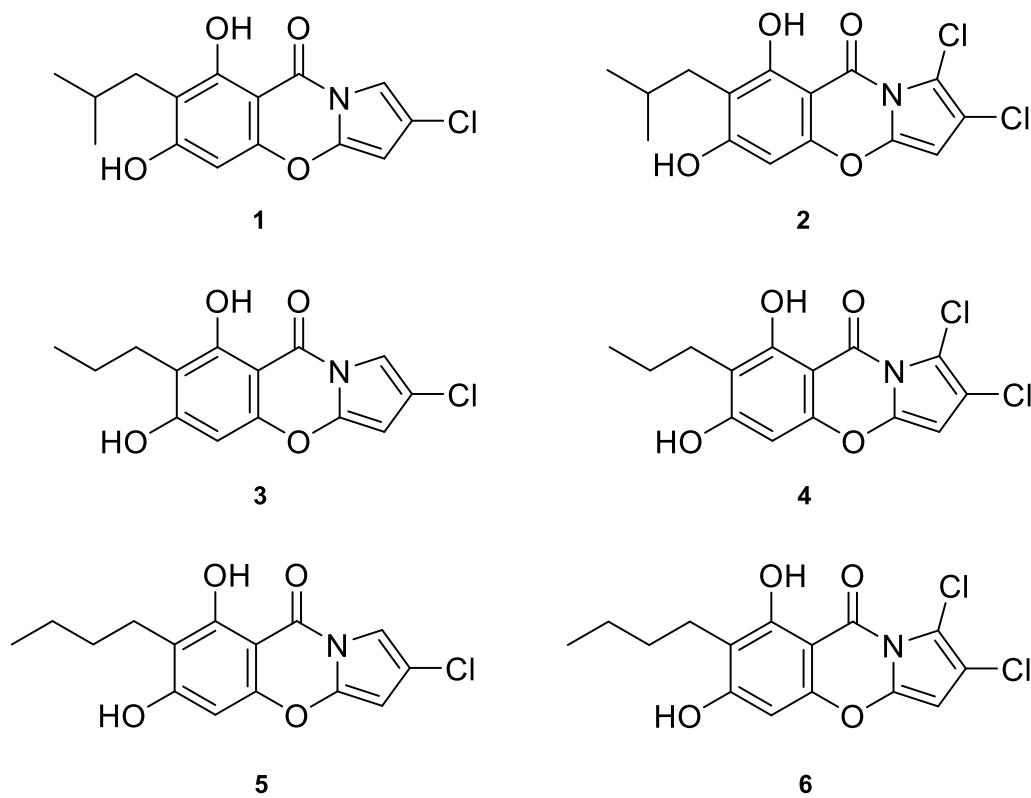

**Figure S1.** Structures of **1-6** isolated from *Streptomyces zhaozhouensis* 208DD-064.

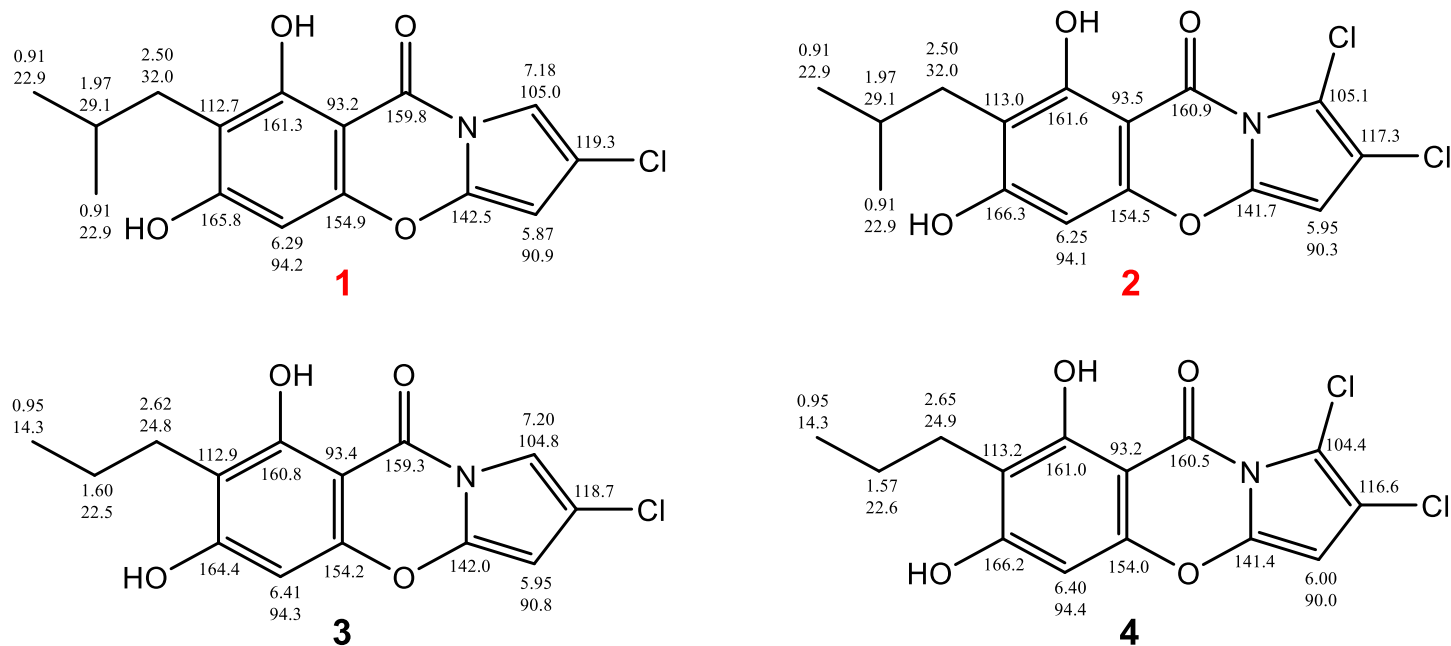

**Figure S2.** Comparison of chemical shifts between the new compounds (**1** and **2** in CD<sub>3</sub>OD) and known analogs (**3** and **4** in acetone-*d*<sub>6</sub>).

NMR data for compounds **3**, **4** were adopted from Ref. “Novel streptopyrroles from *Streptomyces rimosus* with bacterial protein histidine kinase inhibitory and antimicrobial activities”. *J. Antibiot.* **2000**, 53, 1-11.

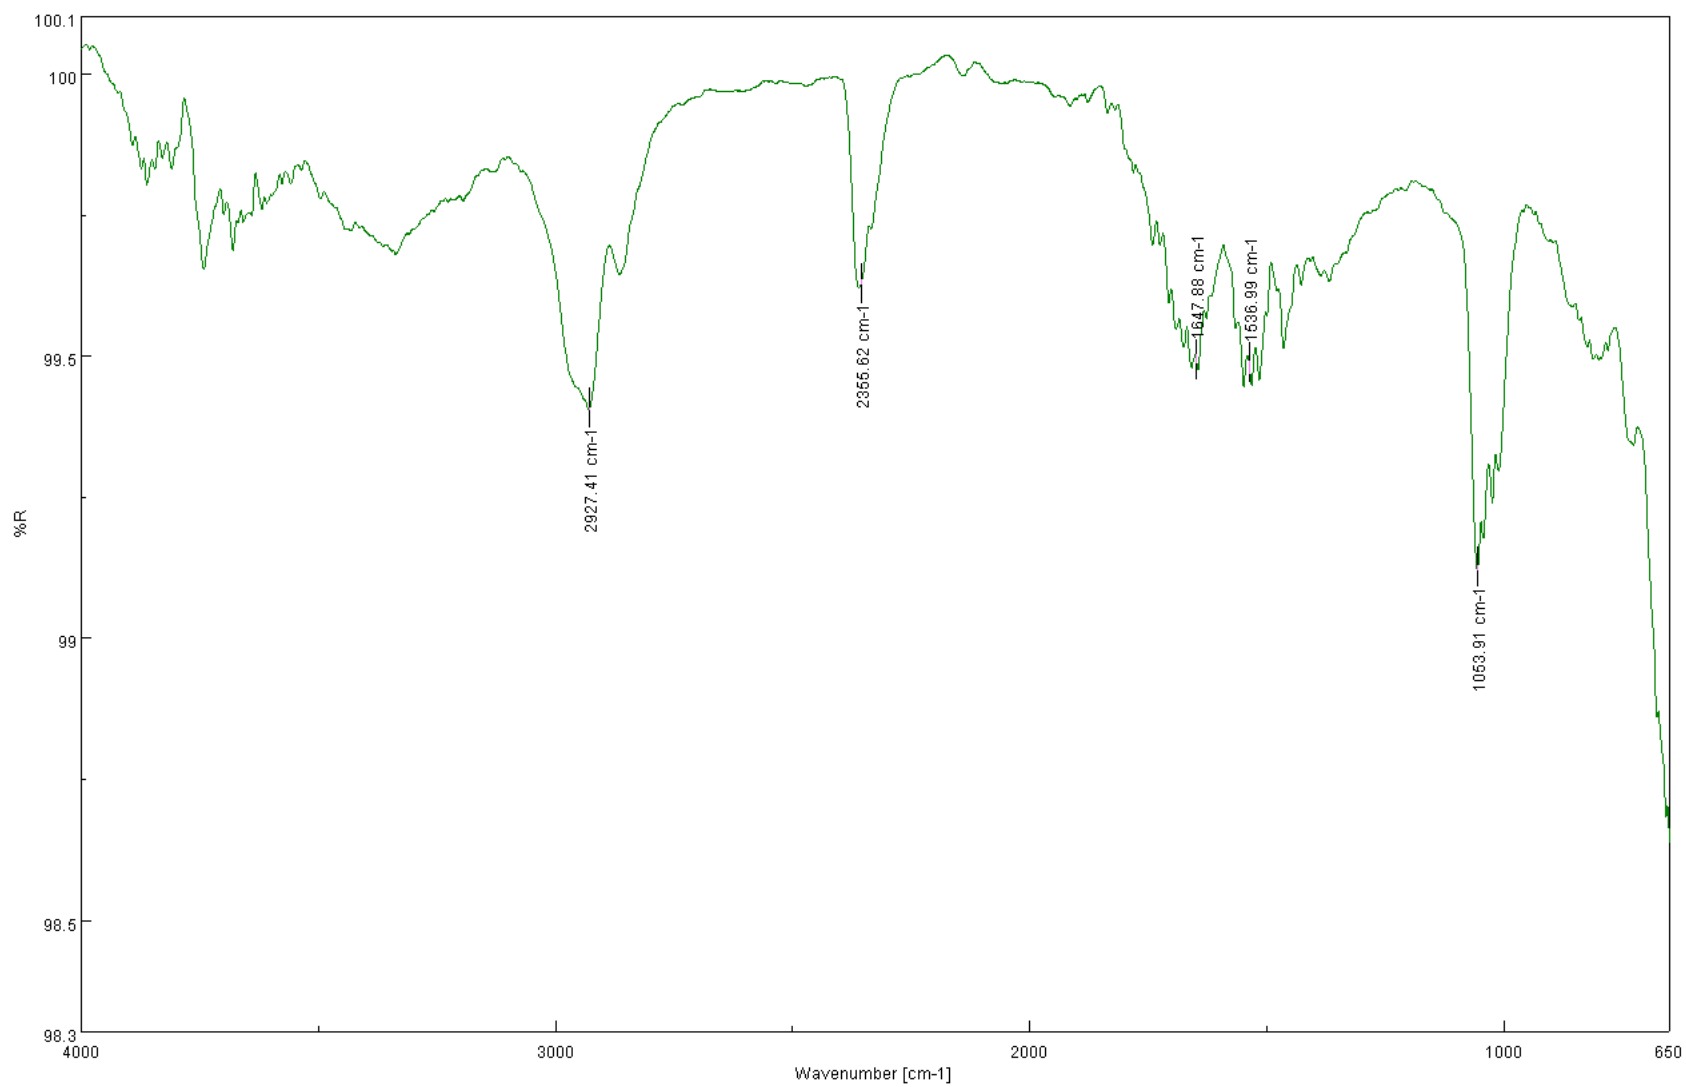

**Figure S3.** IR spectrum of **1**.

20230116\_01\_KIOST-H5\_KIOST\_HRN\_1 13 (0.261) AM2 (Ar,30000.0,0.00,0.00); Cm (13)

1: TOF MS ES-  
2.67e6

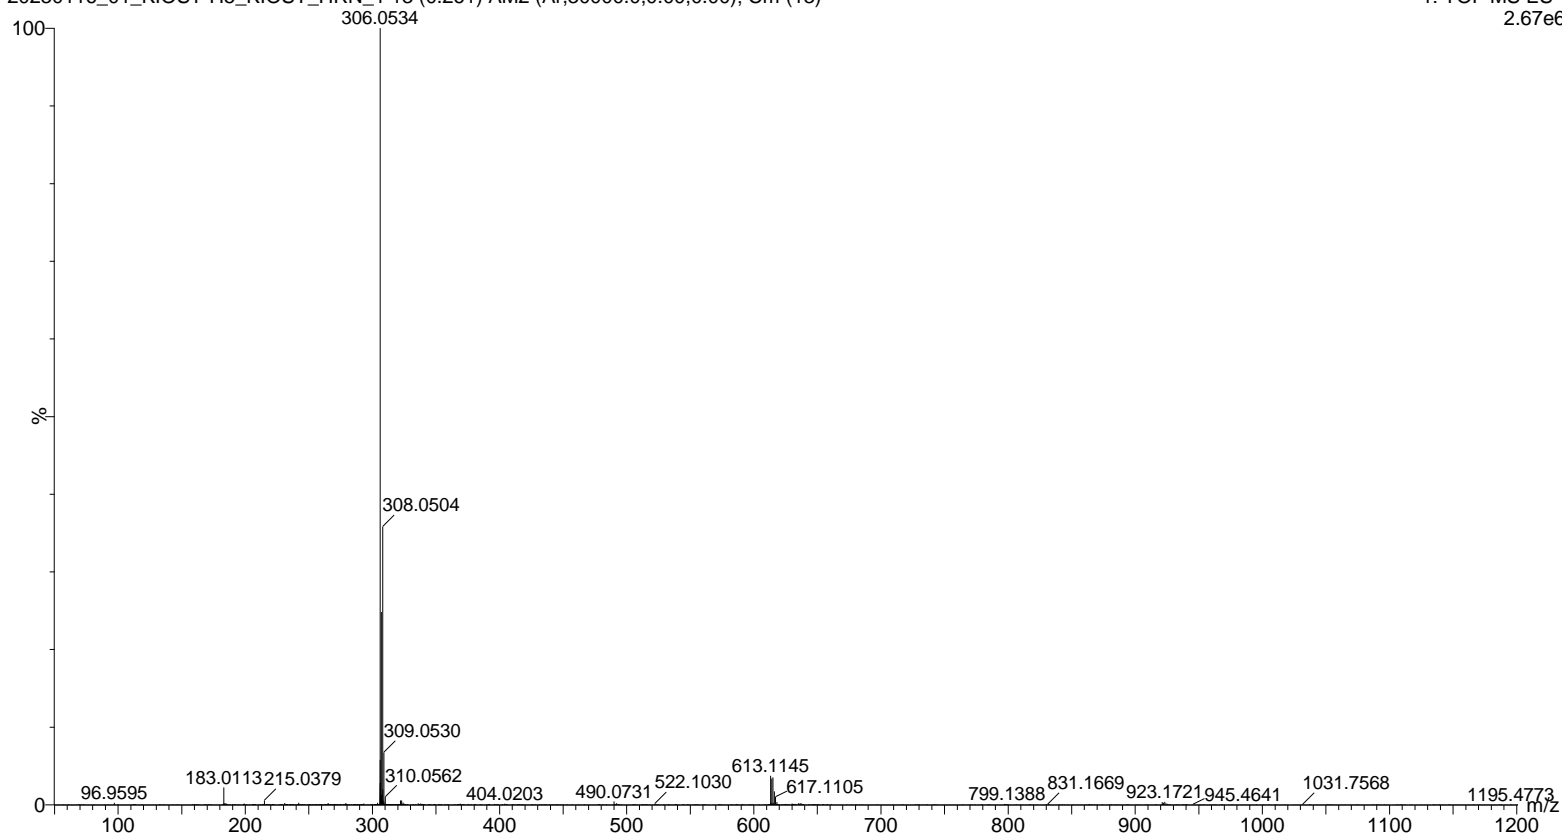

Elements Used:

C: 0-20 H: 0-180 N: 0-2 O: 0-5 Cl: 0-2

Minimum: -9.0

Maximum: 5.0 5.0 100.0

| Mass     | Calc. Mass | mDa | PPM | DBE | i-FIT  | Norm | Conf(%) | Formula         |
|----------|------------|-----|-----|-----|--------|------|---------|-----------------|
| 306.0534 | 306.0533   | 0.1 | 0.3 | 9.5 | 1496.9 | n/a  | n/a     | C15 H13 N O4 Cl |

**Figure S4.** HRESMS data of **1**.

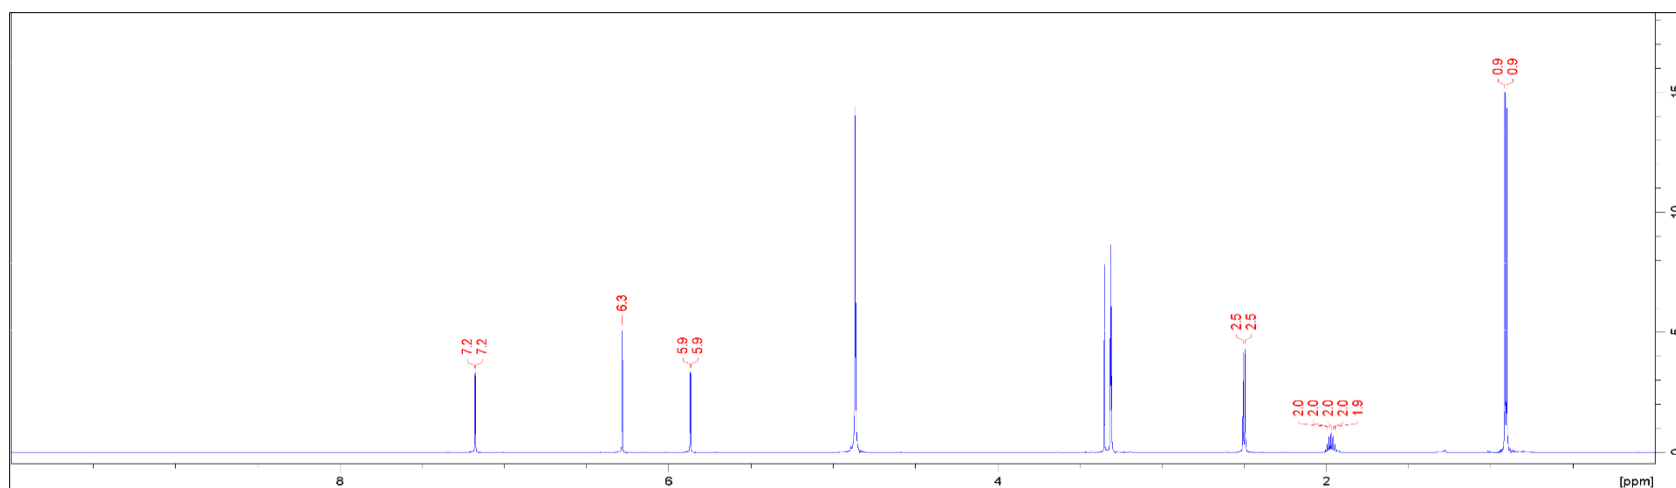

**Figure S5.** <sup>1</sup>H NMR spectrum of **1** (CD<sub>3</sub>OD).

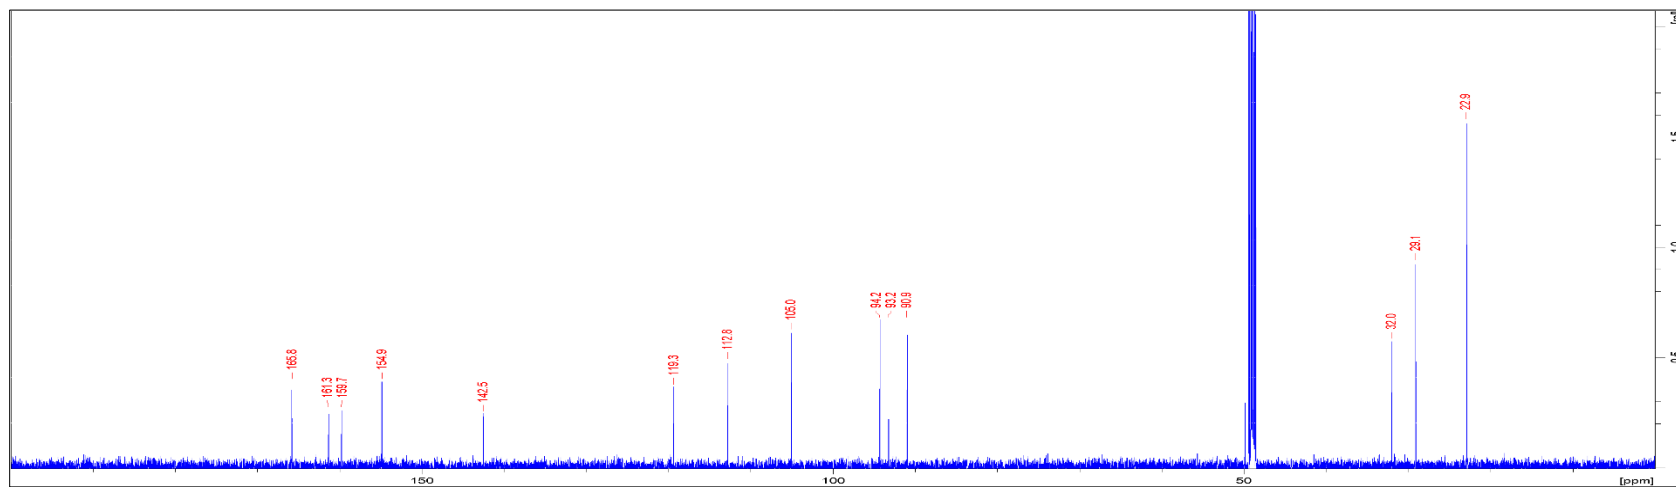

**Figure S6.** <sup>13</sup>C NMR spectrum of **1** (CD<sub>3</sub>OD).

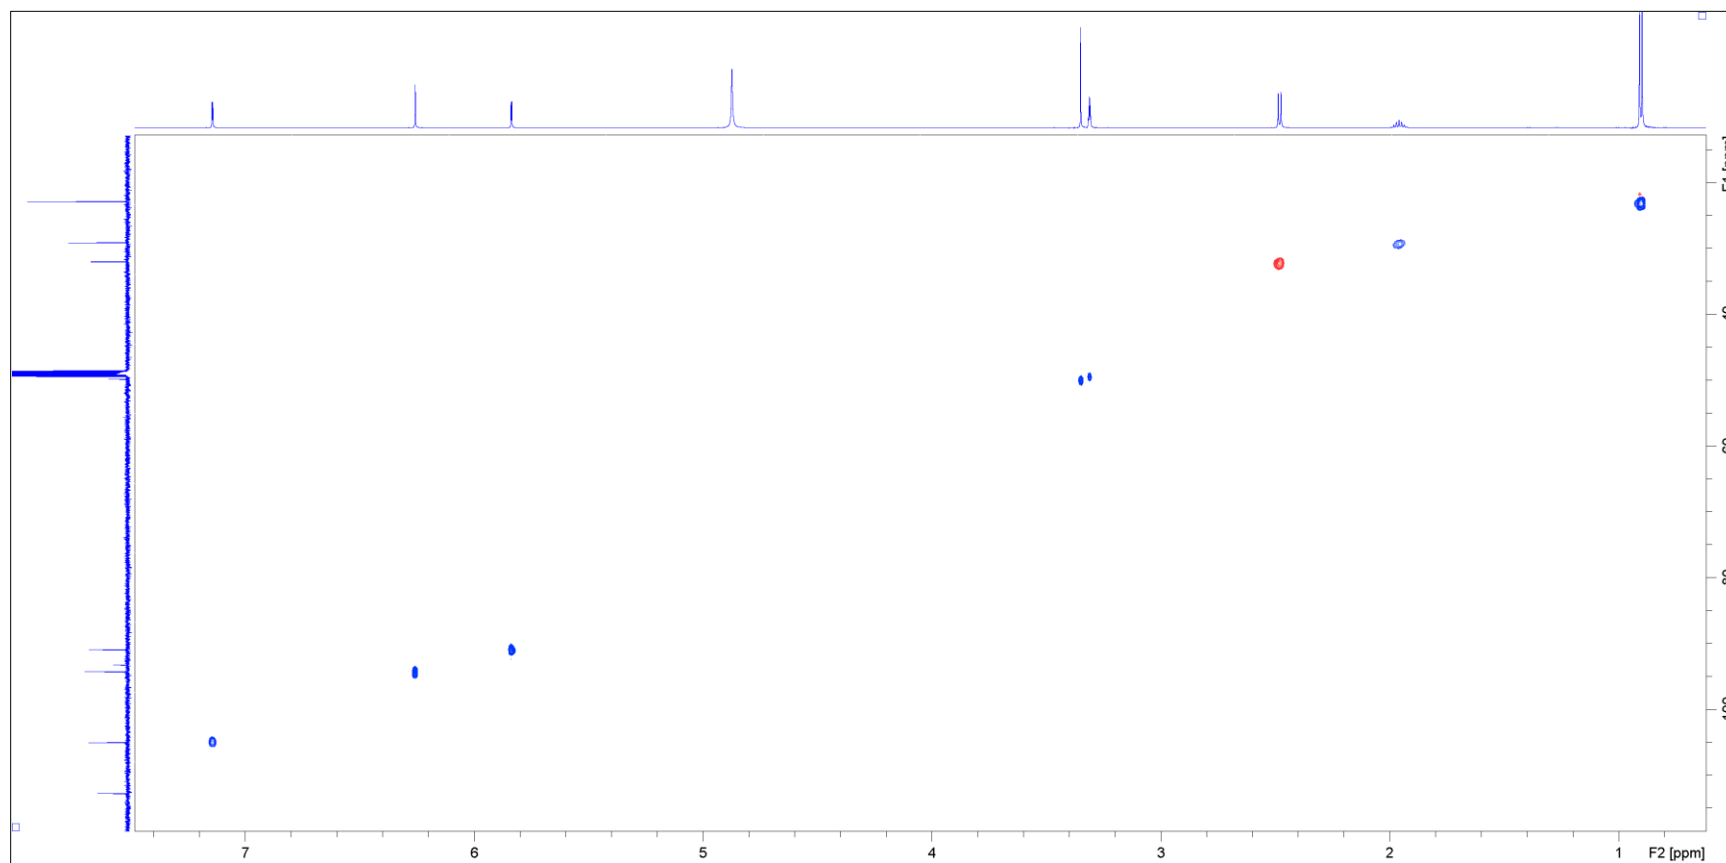

**Figure S7.** HSQC spectrum of **1** (CD<sub>3</sub>OD).

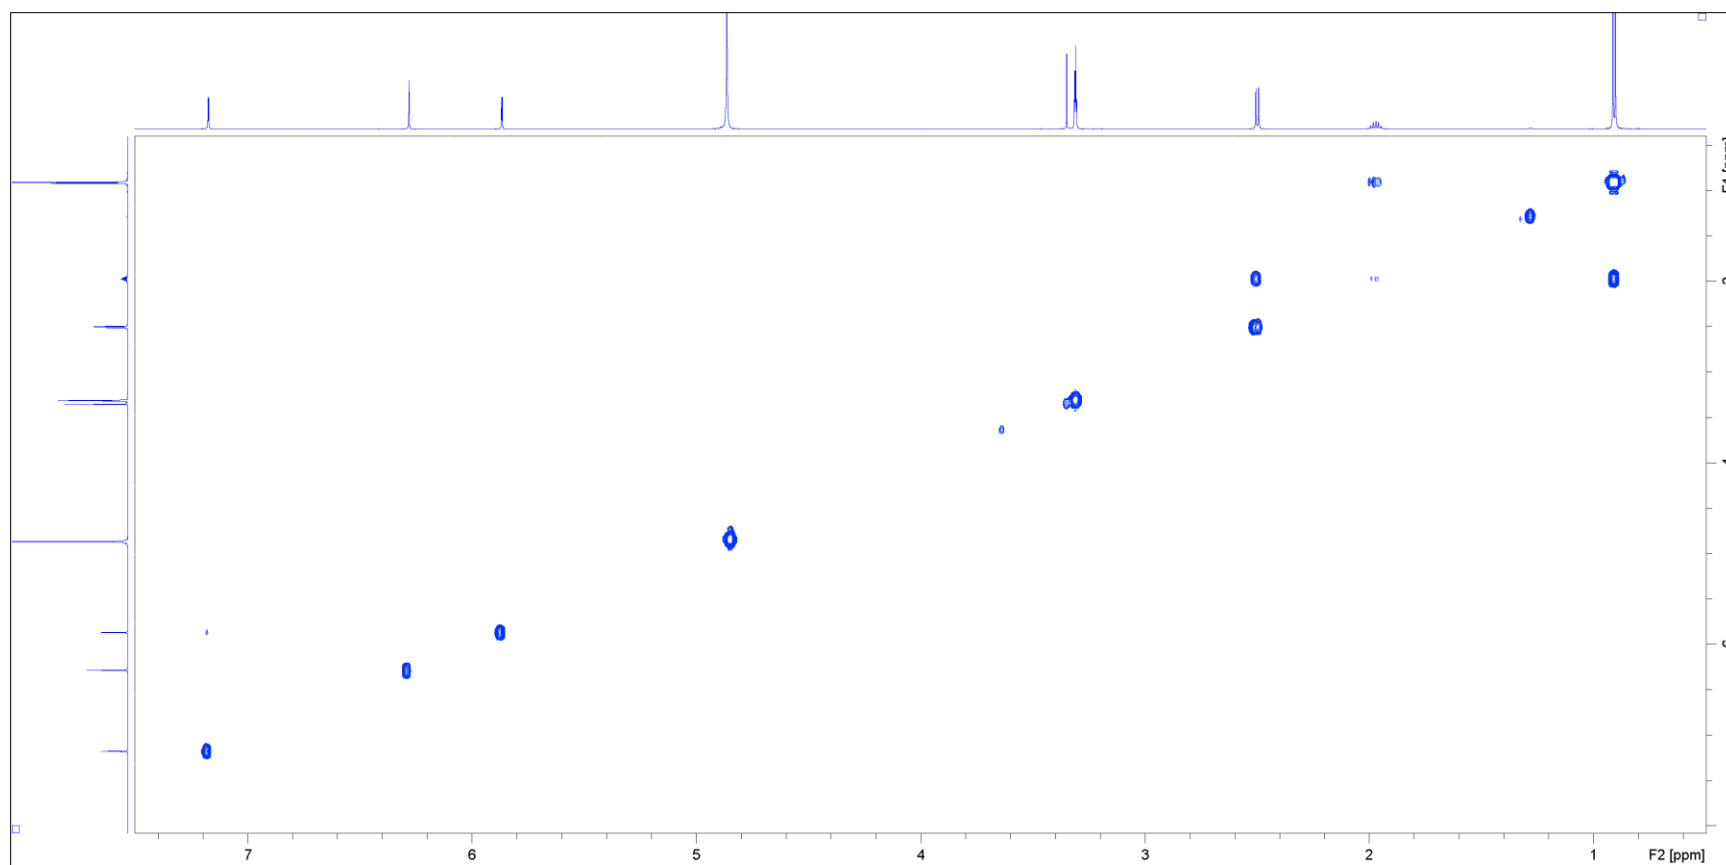

**Figure S8.**  $^1\text{H}$ - $^1\text{H}$  COSY spectrum of **1** ( $\text{CD}_3\text{OD}$ ).



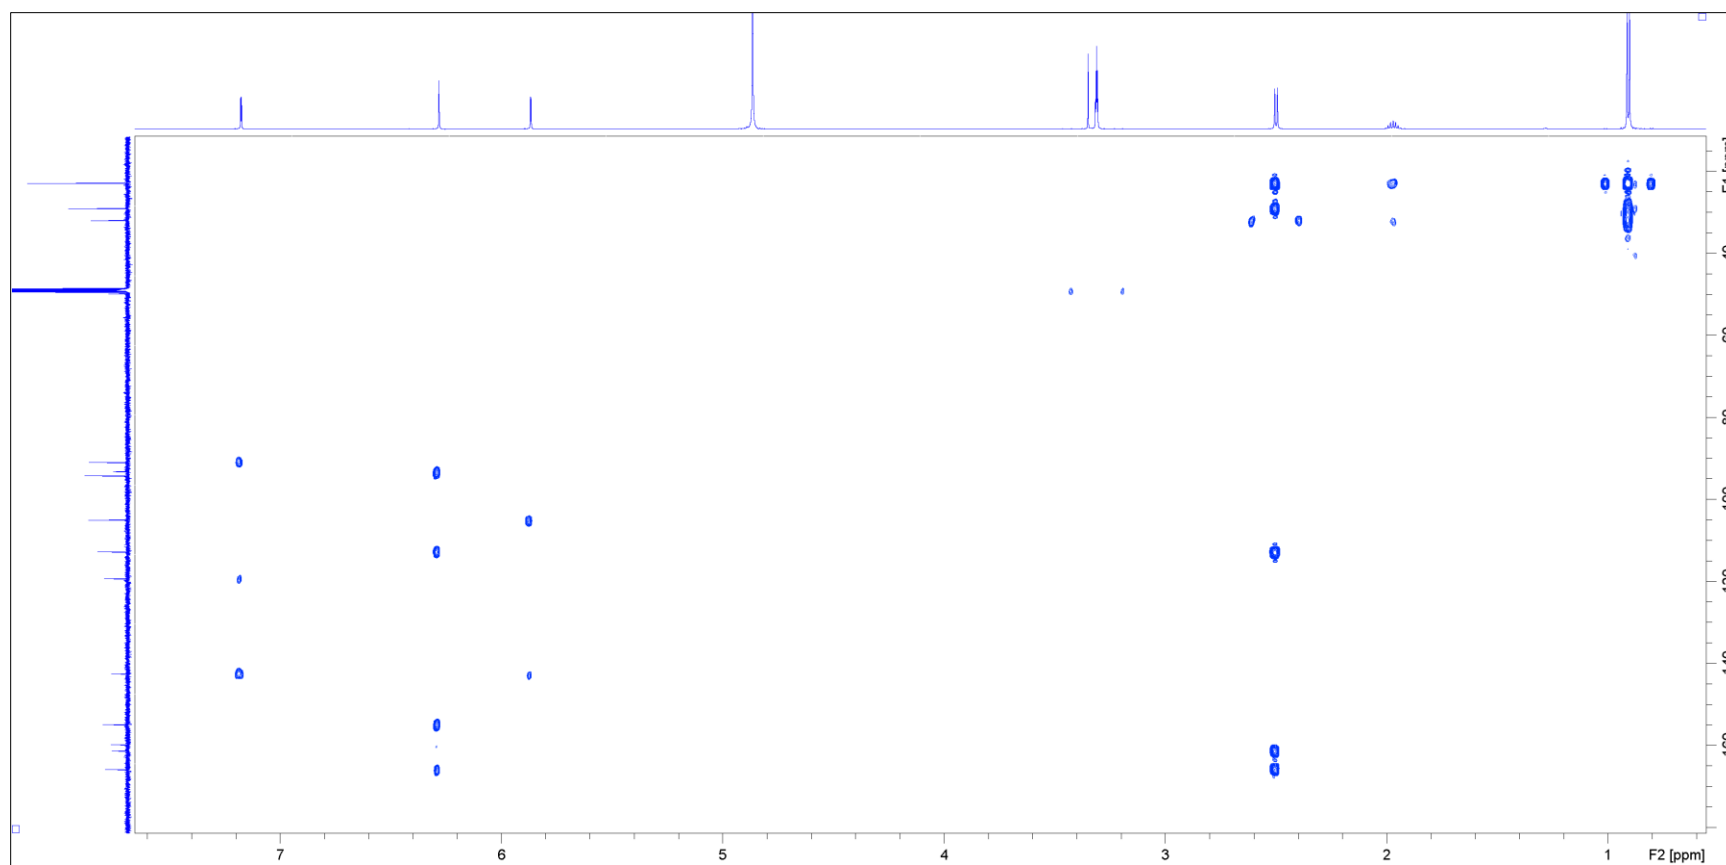

**Figure S9.** HMBC spectrum of **1** (CD<sub>3</sub>OD).

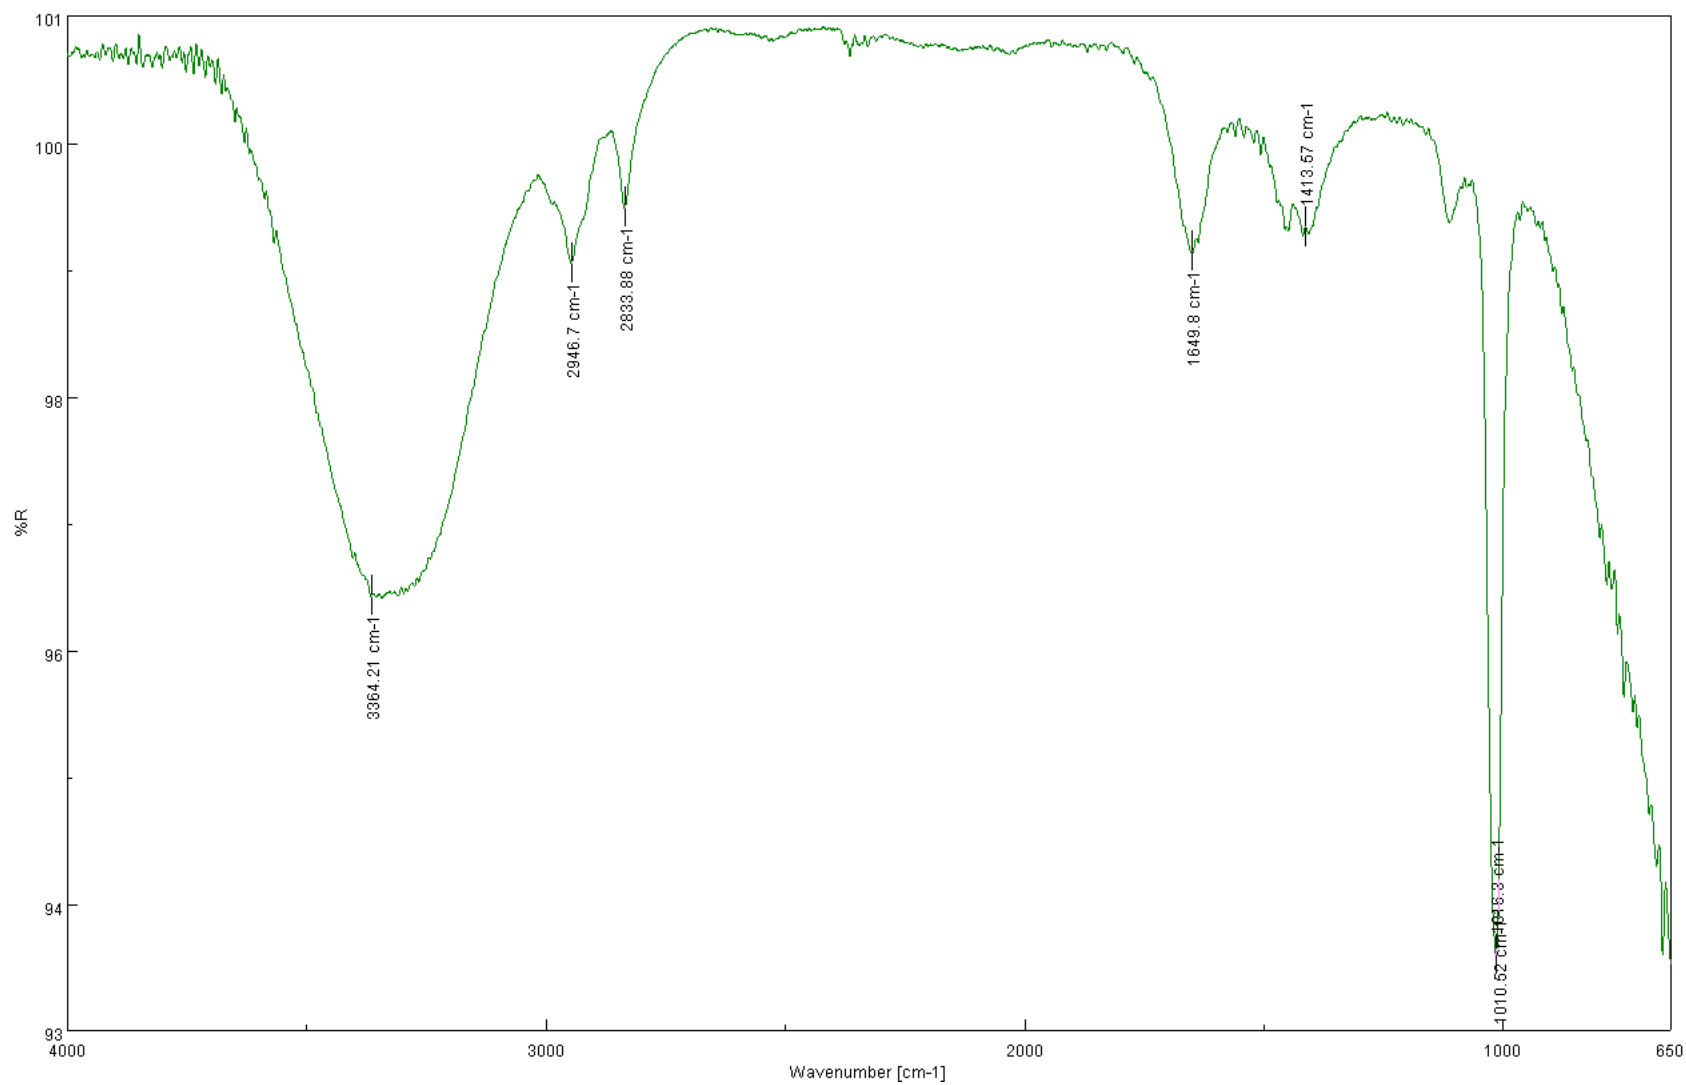

**Figure S10.** IR spectrum of **2**.

20230116\_02\_KIOST-H7-1\_KIOST\_HRN\_4 14 (0.278) AM2 (Ar,30000.0,0.00,0.00); Cm (14)

1: TOF MS ES-  
3.98e5

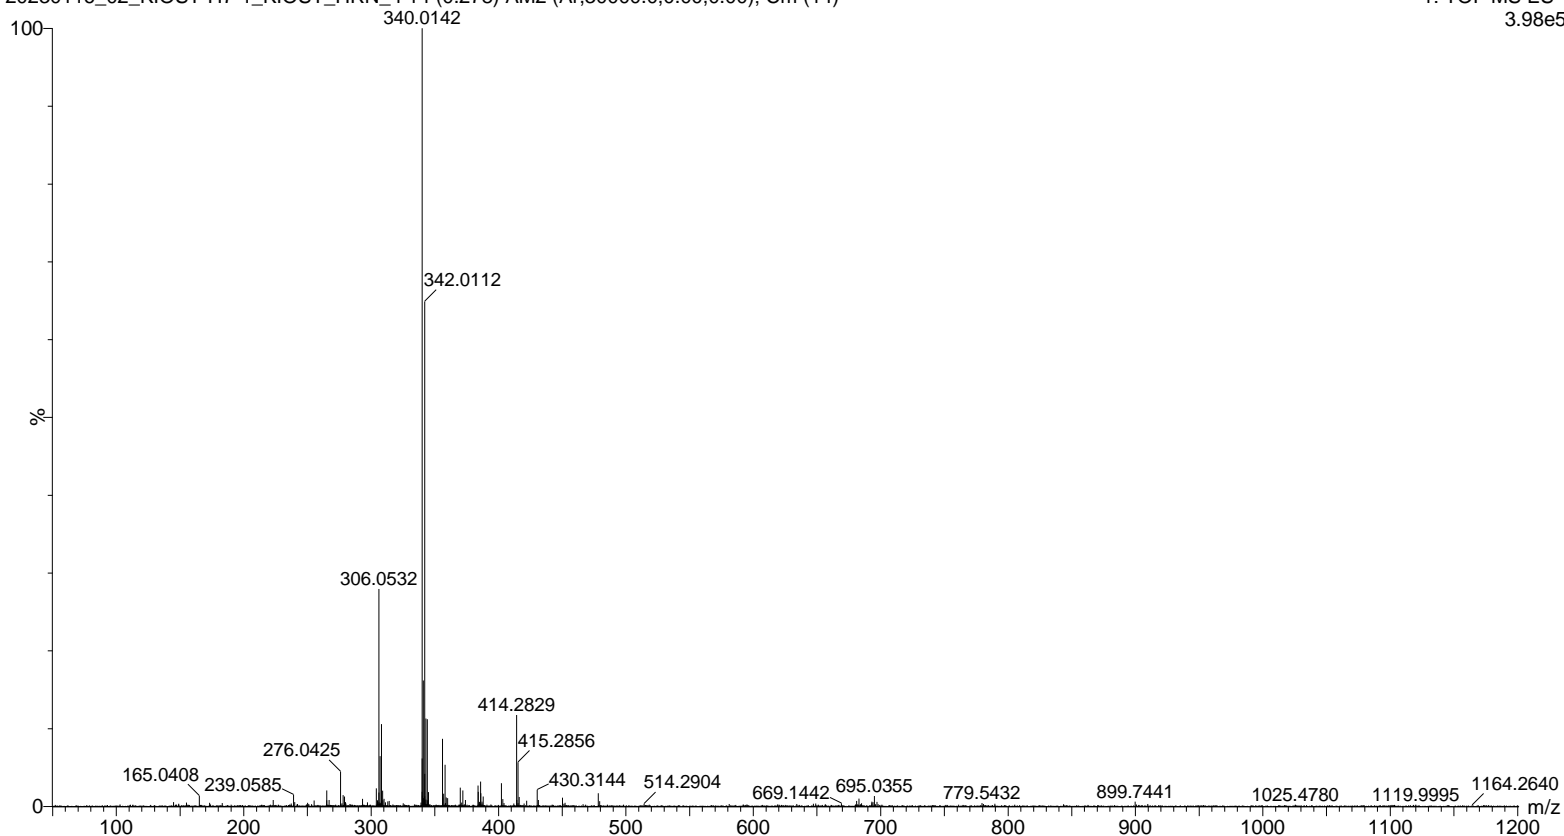

Elements Used:

C: 0-20 H: 0-180 N: 0-2 O: 0-5 Cl: 0-2

Minimum: -9.0

Maximum: 5.0 5.0 100.0

| Mass     | Calc. Mass | mDa  | PPM  | DBE | i-FIT | Norm | Conf(%) | Formula          |
|----------|------------|------|------|-----|-------|------|---------|------------------|
| 340.0142 | 340.0143   | -0.1 | -0.3 | 9.5 | 991.2 | n/a  | n/a     | C15 H12 N O4 Cl2 |

**Figure S11.** HRESIMS data of **2**.

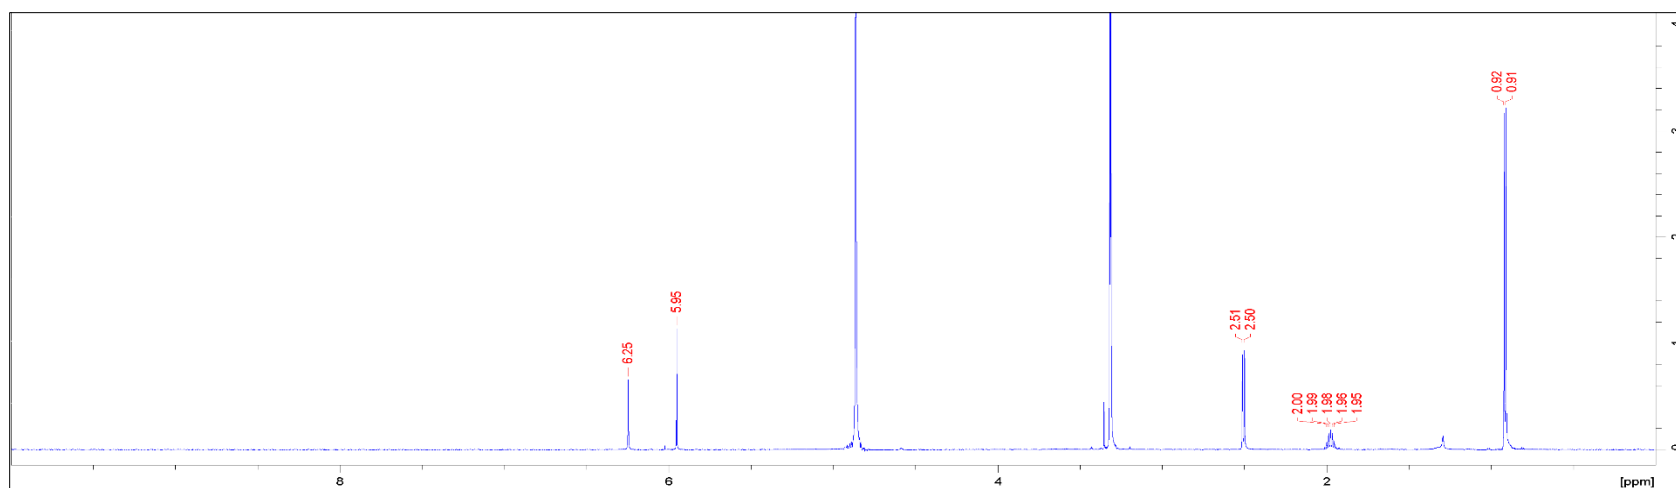

**Figure S12.** <sup>1</sup>H NMR spectrum of **2** (CD<sub>3</sub>OD).

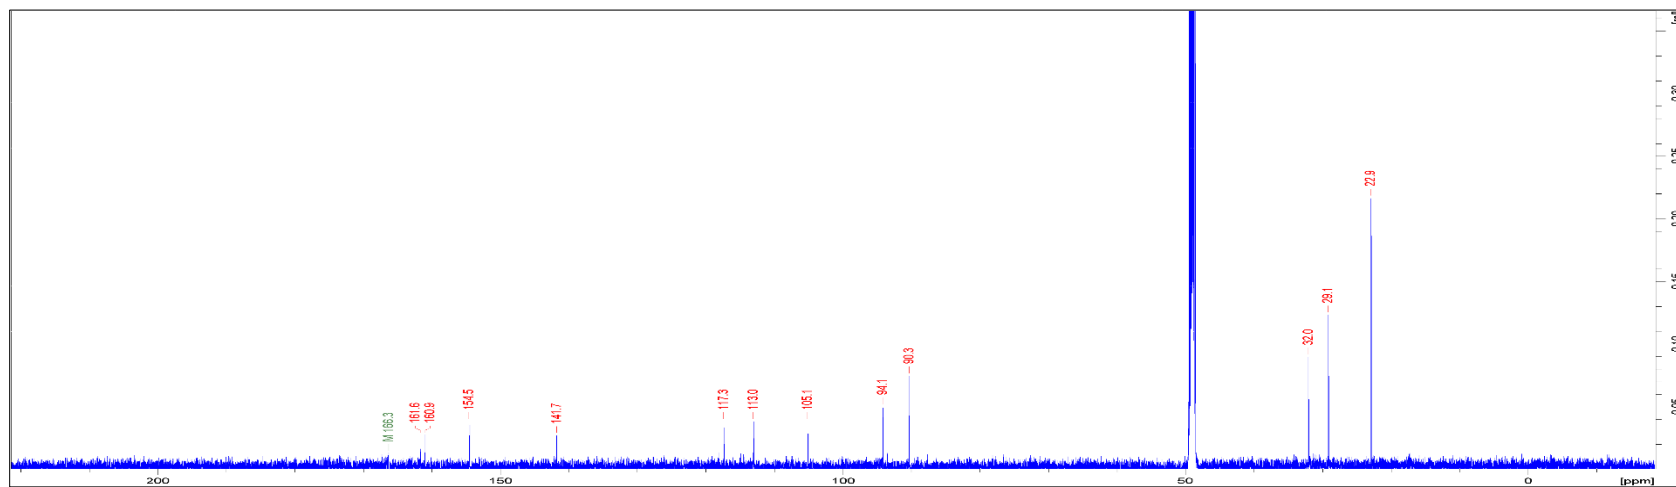

**Figure S13.** <sup>13</sup>C NMR spectrum of **2** (CD<sub>3</sub>OD).

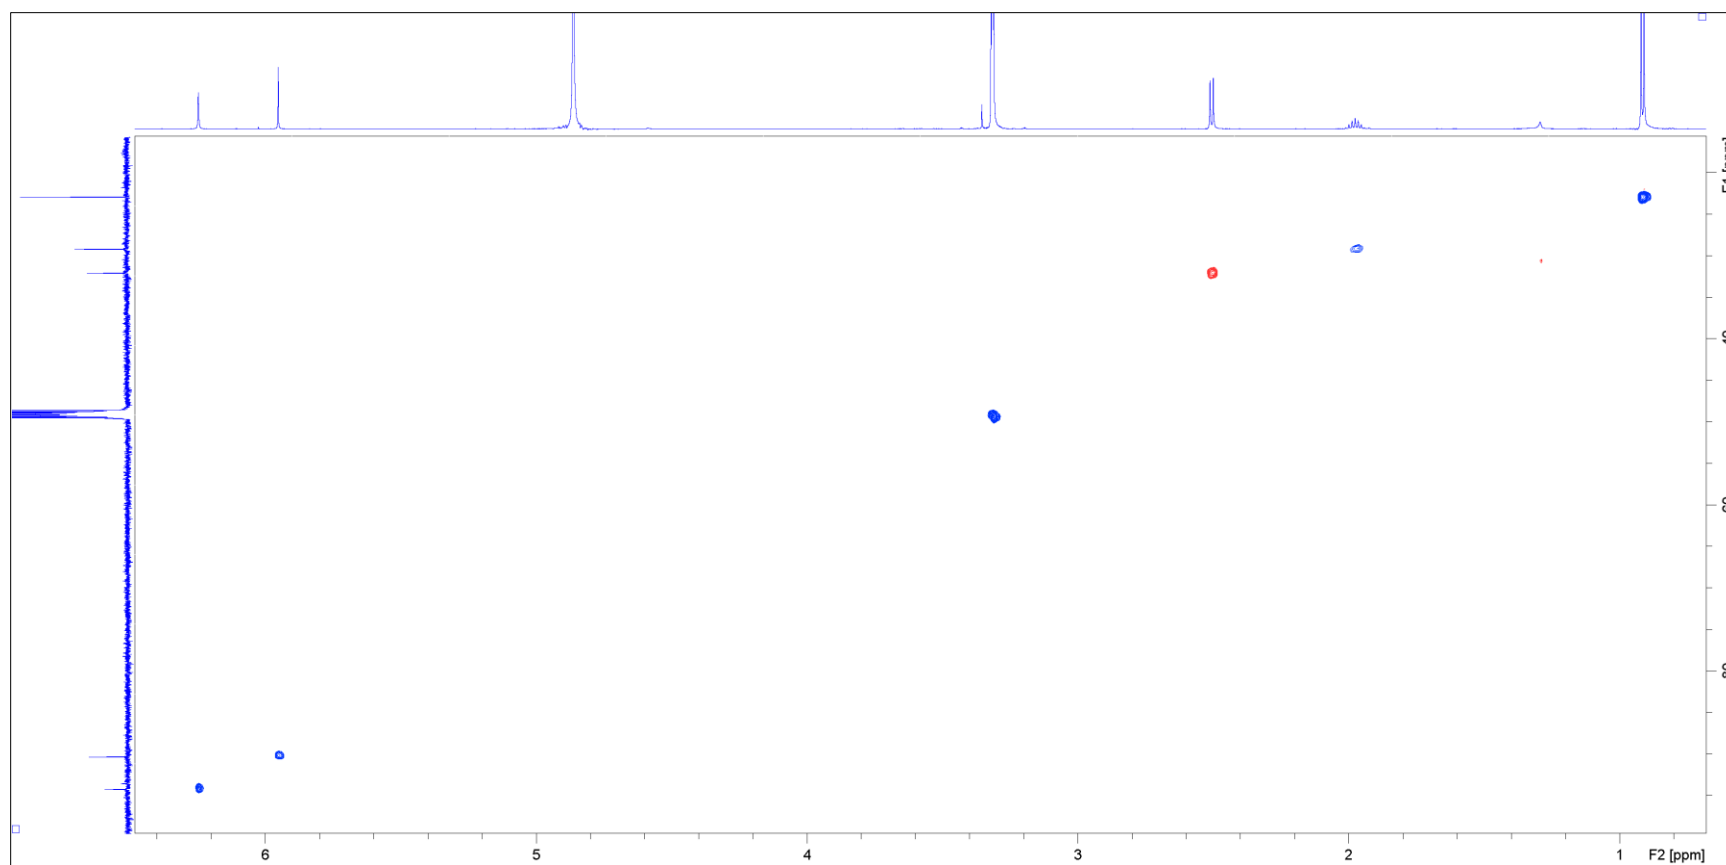

**Figure S14.** HSQC spectrum of **2** (CD<sub>3</sub>OD).

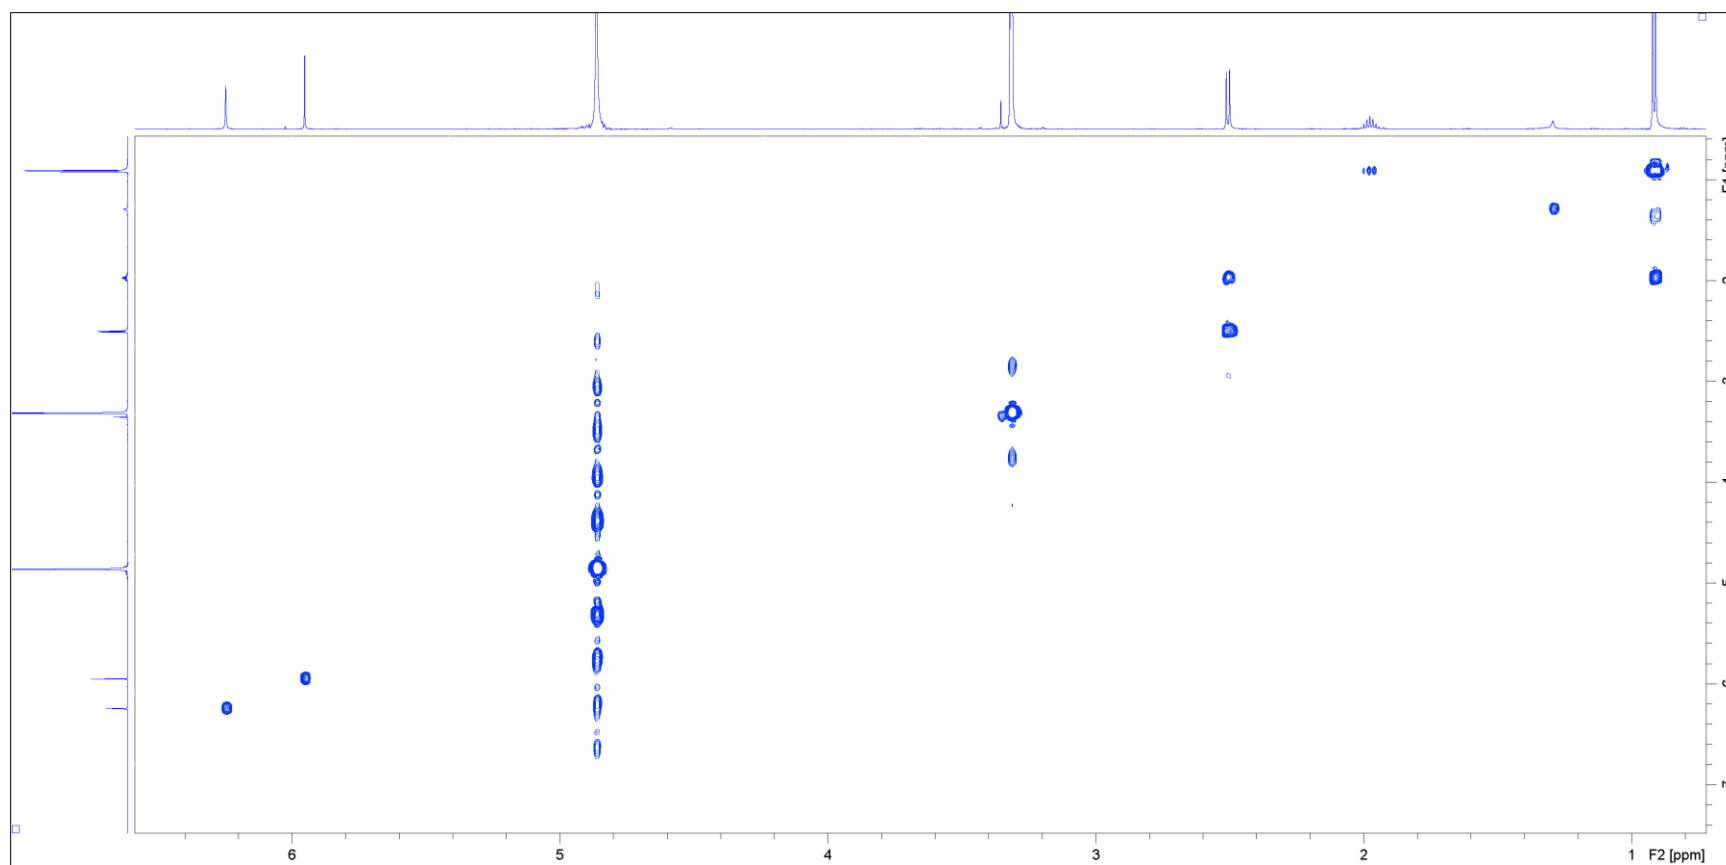

**Figure S15.**  $^1\text{H}$ - $^1\text{H}$  COSY spectrum of **2** ( $\text{CD}_3\text{OD}$ ).

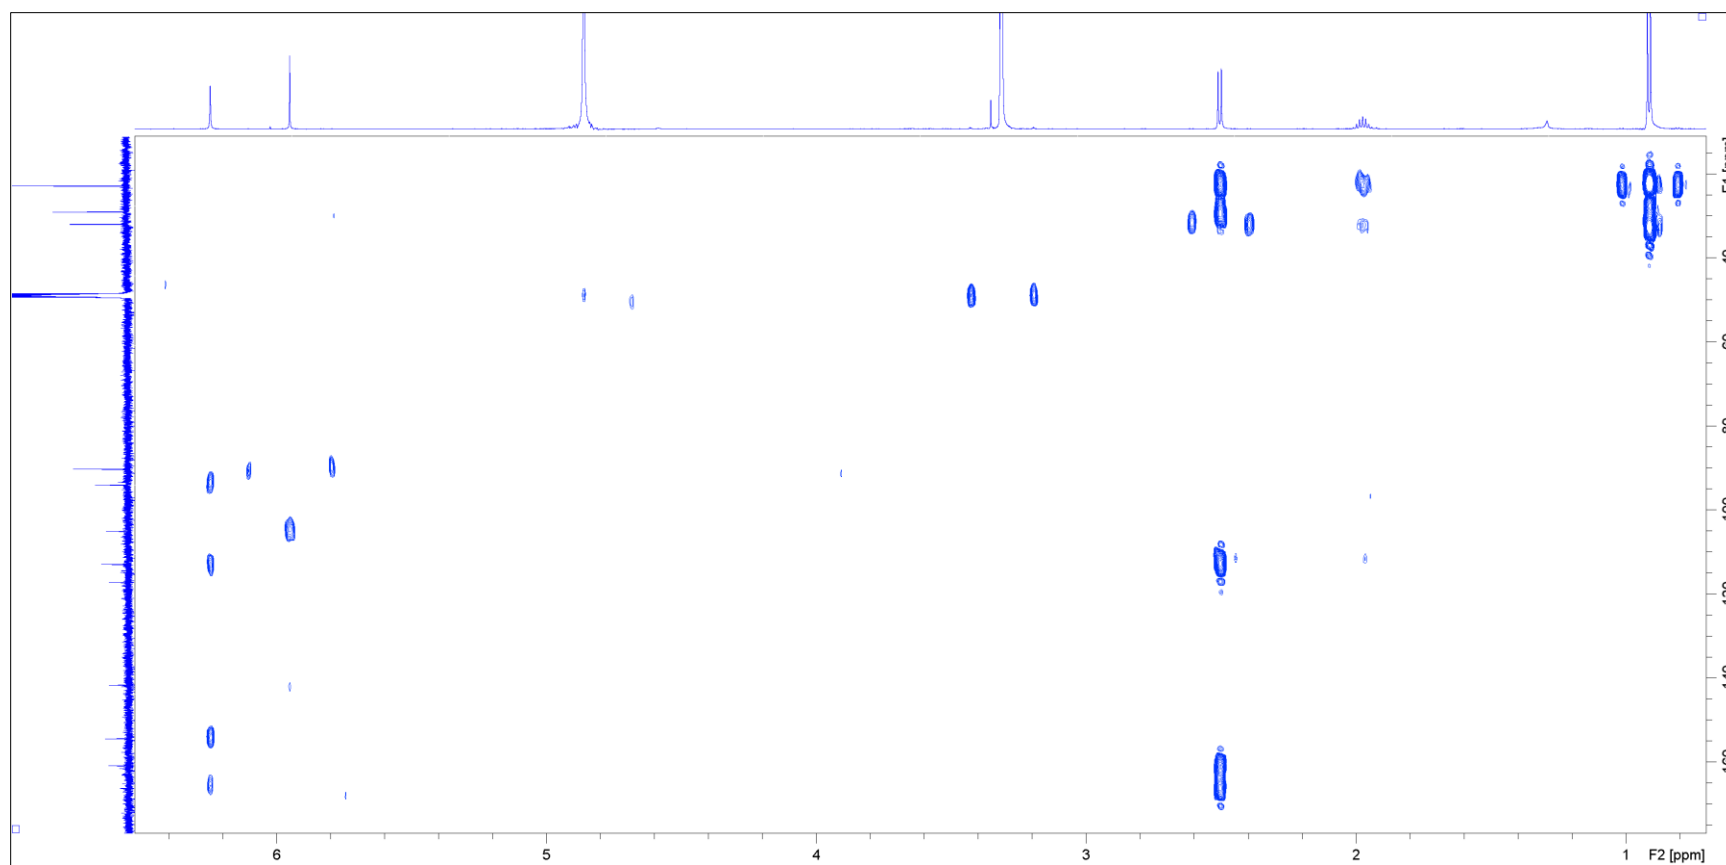

**Figure S16.** HMBC spectrum of **2** (CD<sub>3</sub>OD).

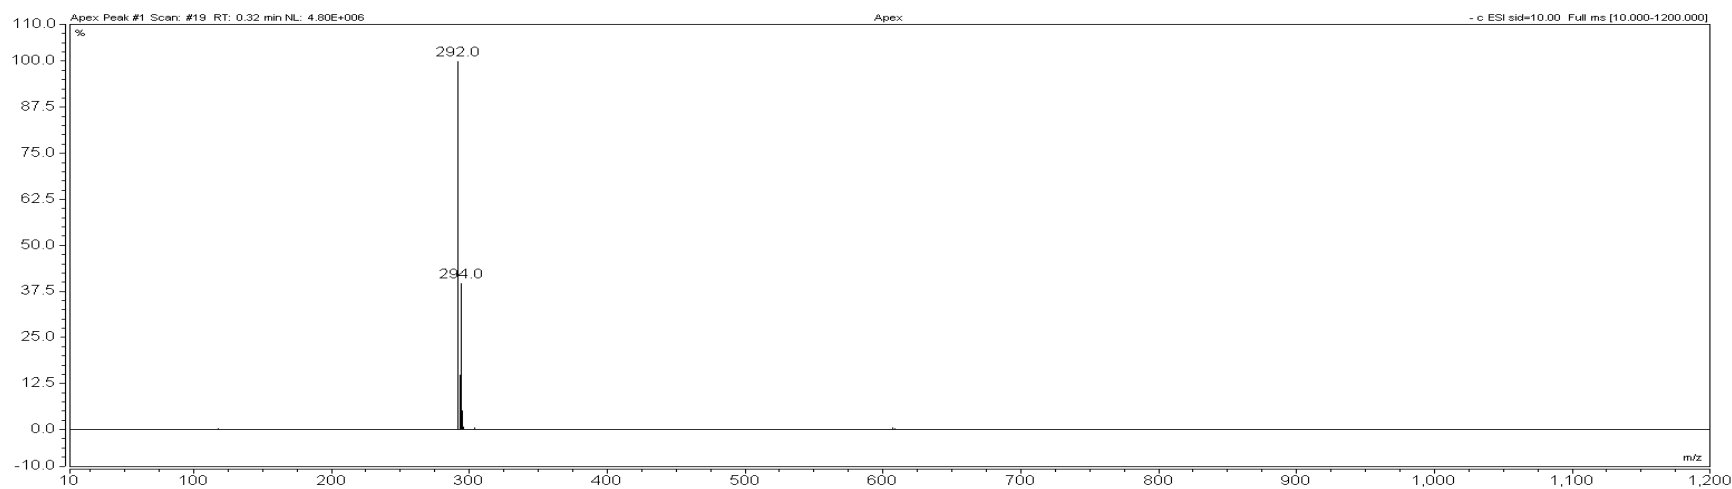

**Figure S17.** LRESIMS data of **3**.

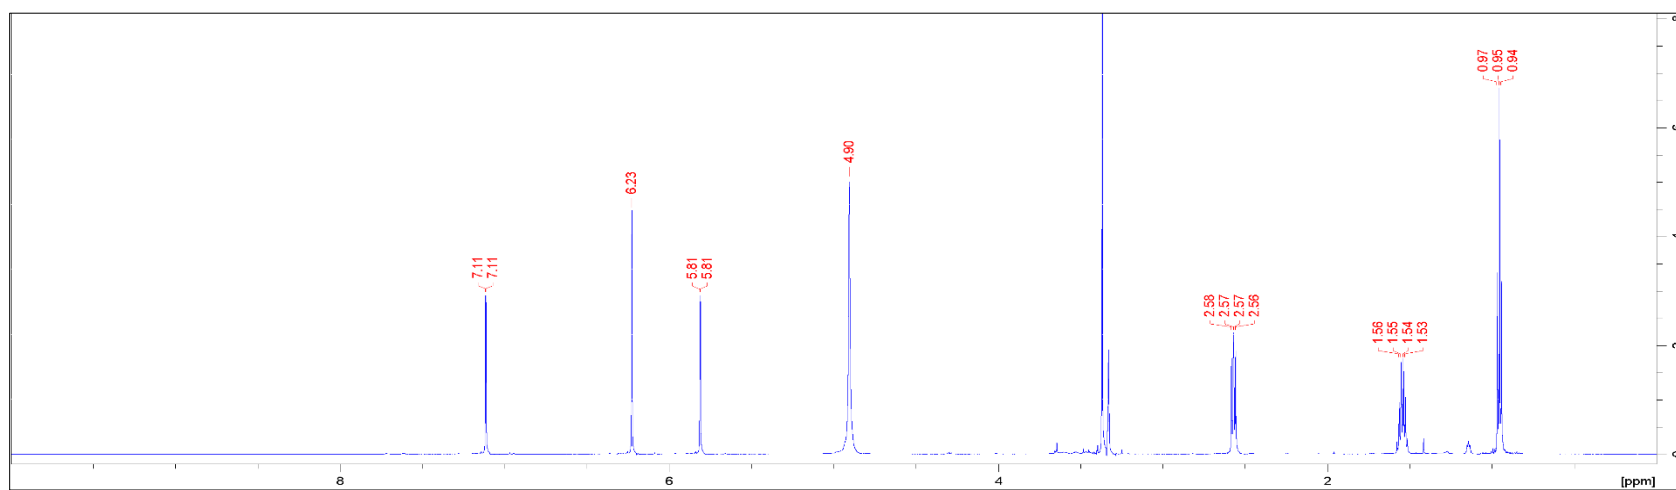

**Figure S18.**  $^1\text{H}$  NMR spectrum of **3** ( $\text{CD}_3\text{OD}$ ).



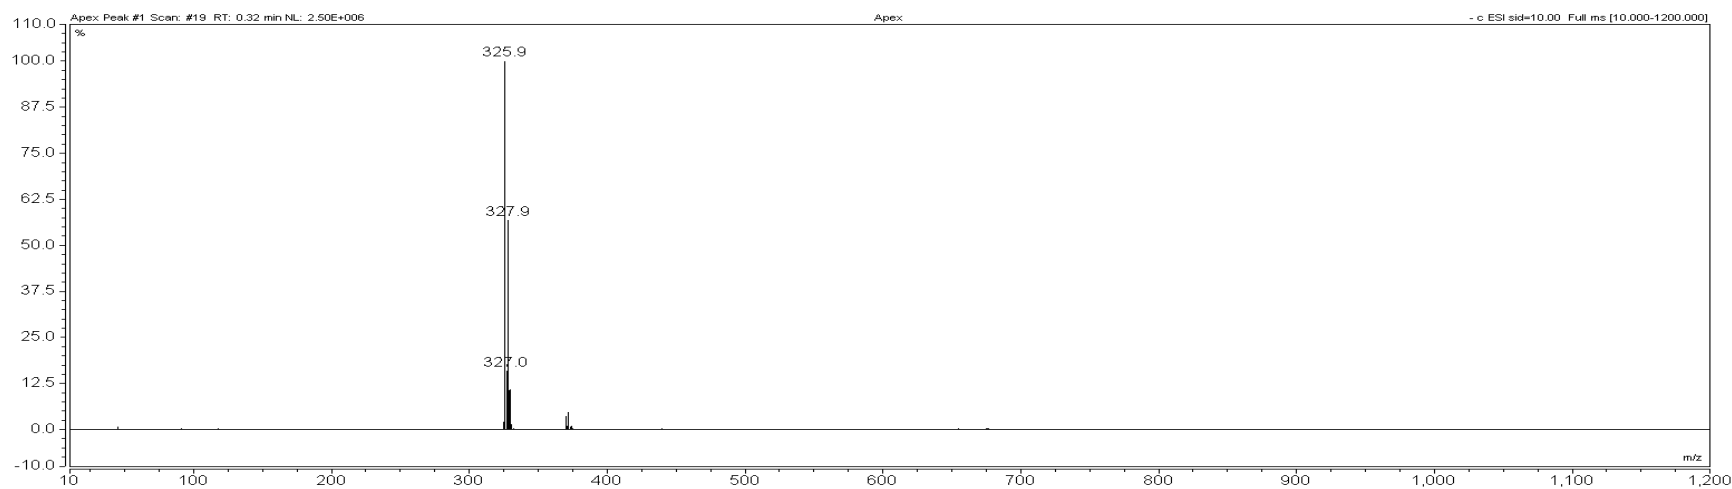

**Figure S19.** LRESIMS data of **4**.

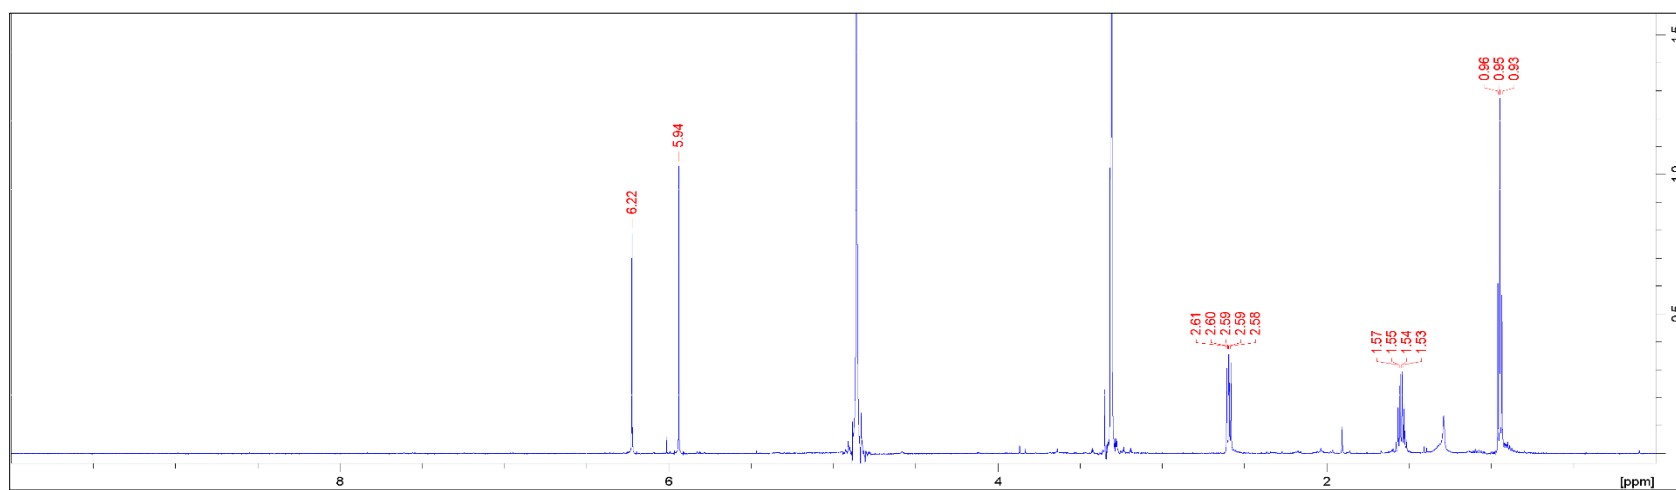

**Figure S20.**  $^1\text{H}$  NMR spectrum of **4** ( $\text{CD}_3\text{OD}$ ).

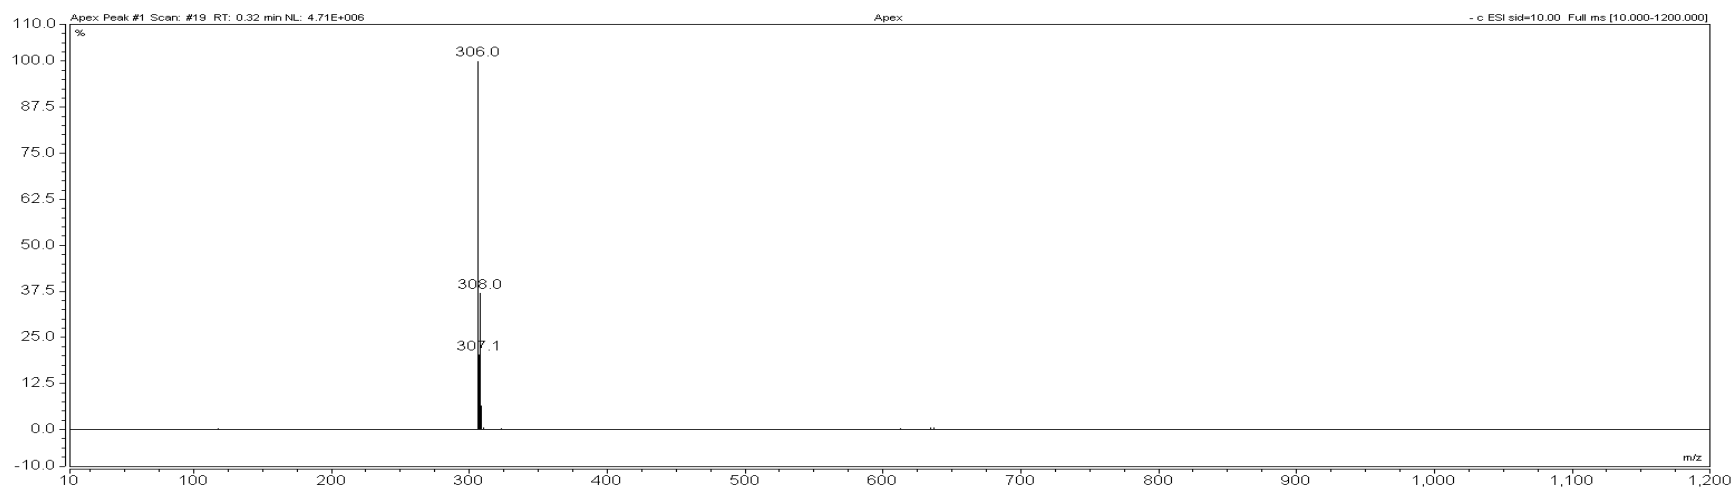

**Figure S21.** LRESIMS data of **5**.

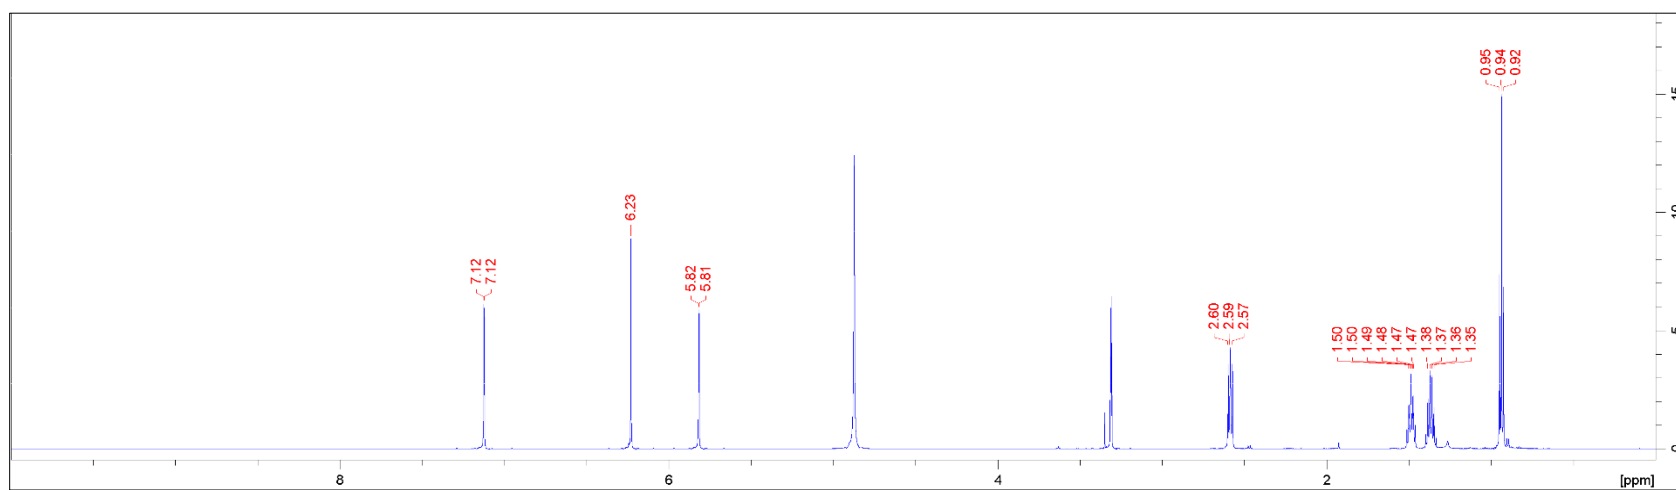

**Figure S22.**  $^1\text{H}$  NMR spectrum of **5** ( $\text{CD}_3\text{OD}$ ).

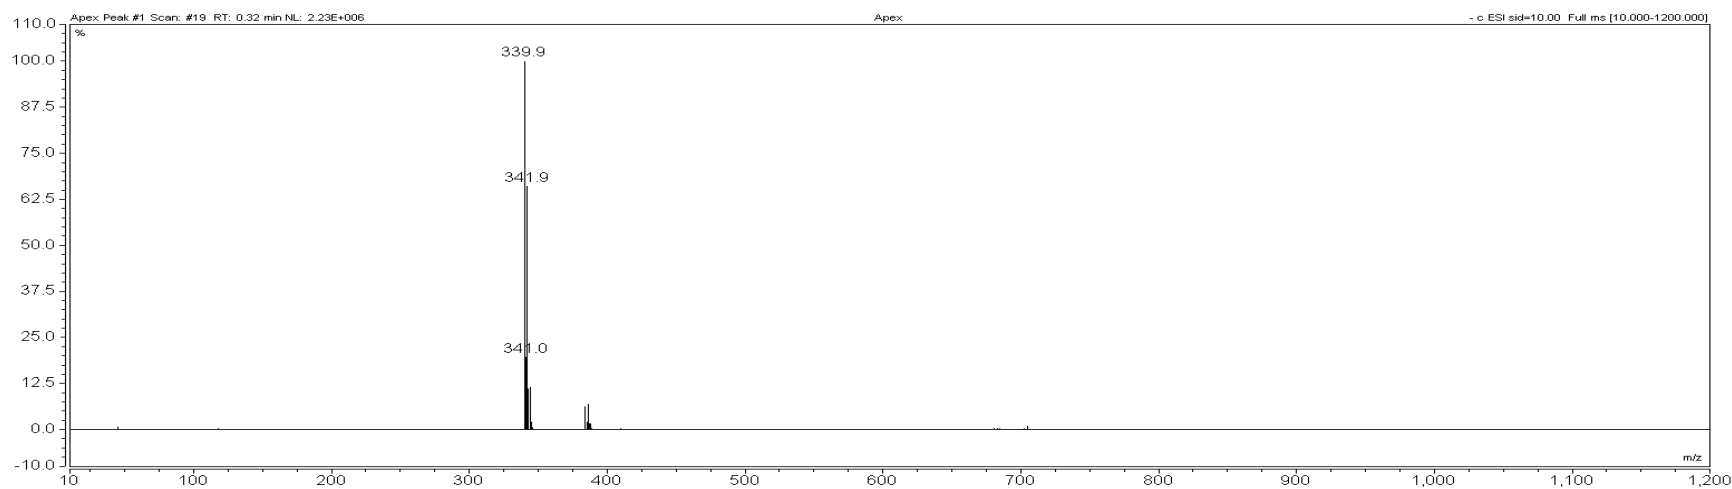

**Figure S23.** LRESIMS data of **6**.

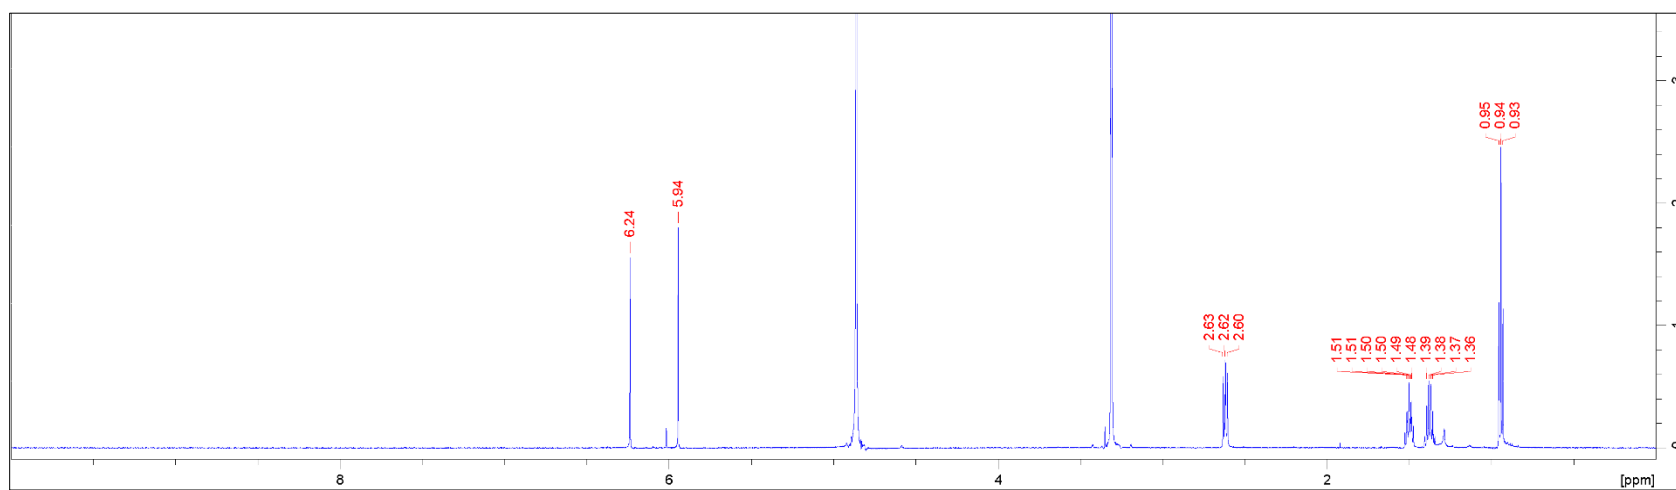

**Figure S24.**  $^1\text{H}$  NMR spectrum of **6** ( $\text{CD}_3\text{OD}$ ).

|            | 1                     |        |      | 3      |       |  | 5      |      |  | Adriamycin            |        |      |
|------------|-----------------------|--------|------|--------|-------|--|--------|------|--|-----------------------|--------|------|
|            | Conc.(ug/ml)          | Mean   | SD   | Mean   | SD    |  | Mean   | SD   |  | Conc.(ug/ml)          | Mean   | SD   |
| ACHN       | 30                    | -28.74 | 5.55 | -29.22 | 4.16  |  | -30.03 | 4.21 |  | 3                     | -7.74  | 5.15 |
|            | 10                    | -4.22  | 2.35 | 0.21   | 7.58  |  | -9.07  | 5.72 |  | 1                     | -5.83  | 3.55 |
|            | 3                     | 21.67  | 7.28 | 19.01  | 4.65  |  | 61.02  | 7.53 |  | 0.3                   | 25.55  | 3.87 |
|            | 1                     | 68.73  | 7.02 | 82.14  | 6.25  |  | 87.32  | 3.88 |  | 0.1                   | 37.90  | 3.82 |
|            | 0.3                   | 93.82  | 1.63 | 96.65  | 4.13  |  | 99.22  | 4.66 |  | 0.03                  | 96.14  | 4.93 |
|            | GI <sub>50</sub>      | 1.490  |      | 1.751  |       |  | 3.222  |      |  | GI <sub>50</sub>      | 0.093  |      |
|            | GI <sub>50</sub> (μM) | 4.853  |      | 5.976  |       |  | 10.495 |      |  | GI <sub>50</sub> (μM) | 0.171  |      |
|            |                       |        |      |        |       |  |        |      |  |                       |        |      |
|            | 1                     |        |      | 3      |       |  | 5      |      |  | Adriamycin            |        |      |
|            | Conc.(ug/ml)          | Mean   | SD   | Mean   | SD    |  | Mean   | SD   |  | Conc.(ug/ml)          | Mean   | SD   |
| PC-3       | 30                    | -31.83 | 3.48 | -28.51 | 4.28  |  | -30.61 | 4.62 |  | 3                     | -9.55  | 1.82 |
|            | 10                    | -2.76  | 2.21 | 1.84   | 9.77  |  | -6.32  | 1.20 |  | 1                     | -4.42  | 4.11 |
|            | 3                     | 26.11  | 6.74 | 33.93  | 3.44  |  | 60.15  | 6.97 |  | 0.3                   | 19.99  | 8.62 |
|            | 1                     | 82.66  | 1.89 | 86.48  | 2.56  |  | 91.92  | 9.13 |  | 0.1                   | 32.49  | 5.50 |
|            | 0.3                   | 97.38  | 3.62 | 99.98  | 2.70  |  | 98.51  | 3.37 |  | 0.03                  | 95.70  | 4.63 |
|            | GI <sub>50</sub>      | 1.920  |      | 2.244  |       |  | 3.207  |      |  | GI <sub>50</sub>      | 0.080  |      |
|            | GI <sub>50</sub> (μM) | 6.253  |      | 7.659  |       |  | 10.446 |      |  | GI <sub>50</sub> (μM) | 0.147  |      |
|            |                       |        |      |        |       |  |        |      |  |                       |        |      |
|            | 1                     |        |      | 3      |       |  | 5      |      |  | Adriamycin            |        |      |
|            | Conc.(ug/ml)          | Mean   | SD   | Mean   | SD    |  | Mean   | SD   |  | Conc.(ug/ml)          | Mean   | SD   |
| NCI-H23    | 30                    | -28.94 | 7.58 | -24.36 | 6.08  |  | -34.25 | 5.35 |  | 3                     | -14.08 | 3.85 |
|            | 10                    | -3.66  | 3.18 | -8.39  | 3.72  |  | -8.72  | 3.68 |  | 1                     | -3.76  | 3.44 |
|            | 3                     | 22.53  | 7.88 | 21.86  | 5.63  |  | 63.95  | 4.15 |  | 0.3                   | 17.16  | 2.00 |
|            | 1                     | 83.98  | 4.64 | 89.50  | 9.52  |  | 84.30  | 5.92 |  | 0.1                   | 25.42  | 4.80 |
|            | 0.3                   | 97.69  | 6.02 | 95.48  | 5.90  |  | 97.62  | 3.90 |  | 0.03                  | 96.66  | 6.95 |
|            | GI <sub>50</sub>      | 1.870  |      | 1.989  |       |  | 3.306  |      |  | GI <sub>50</sub>      | 0.073  |      |
|            | GI <sub>50</sub> (μM) | 6.090  |      | 6.788  |       |  | 10.769 |      |  | GI <sub>50</sub> (μM) | 0.133  |      |
|            |                       |        |      |        |       |  |        |      |  |                       |        |      |
|            | 1                     |        |      | 3      |       |  | 5      |      |  | Adriamycin            |        |      |
|            | Conc.(ug/ml)          | Mean   | SD   | Mean   | SD    |  | Mean   | SD   |  | Conc.(ug/ml)          | Mean   | SD   |
| MDA-MB-231 | 30                    | -29.49 | 4.55 | -31.21 | 1.43  |  | -30.78 | 5.54 |  | 3                     | -10.35 | 3.72 |
|            | 10                    | -4.42  | 8.20 | 0.22   | 6.90  |  | -10.99 | 4.83 |  | 1                     | -3.01  | 3.69 |
|            | 3                     | 29.00  | 2.54 | 38.85  | 6.95  |  | 66.67  | 4.04 |  | 0.3                   | 17.16  | 9.01 |
|            | 1                     | 83.30  | 5.26 | 76.13  | 10.41 |  | 85.46  | 4.33 |  | 0.1                   | 28.58  | 8.16 |
|            | 0.3                   | 95.06  | 6.10 | 93.22  | 6.77  |  | 97.80  | 1.24 |  | 0.03                  | 95.99  | 4.65 |
|            | GI <sub>50</sub>      | 2.000  |      | 2.080  |       |  | 3.290  |      |  | GI <sub>50</sub>      | 0.075  |      |
|            | GI <sub>50</sub> (μM) | 6.514  |      | 7.099  |       |  | 10.717 |      |  | GI <sub>50</sub> (μM) | 0.138  |      |
|            |                       |        |      |        |       |  |        |      |  |                       |        |      |
|            | 1                     |        |      | 3      |       |  | 5      |      |  | Adriamycin            |        |      |
|            | Conc.(ug/ml)          | Mean   | SD   | Mean   | SD    |  | Mean   | SD   |  | Conc.(ug/ml)          | Mean   | SD   |
| NUGC-3     | 30                    | -30.32 | 5.20 | -33.45 | 6.28  |  | -38.09 | 4.87 |  | 3                     | -11.43 | 5.75 |
|            | 10                    | 0.89   | 8.76 | -5.92  | 6.87  |  | -13.38 | 6.39 |  | 1                     | -4.75  | 6.54 |
|            | 3                     | 19.21  | 5.82 | 27.13  | 4.36  |  | 57.31  | 4.16 |  | 0.3                   | 17.63  | 6.64 |
|            | 1                     | 76.37  | 6.79 | 80.05  | 5.94  |  | 80.91  | 8.04 |  | 0.1                   | 34.07  | 7.02 |
|            | 0.3                   | 97.61  | 0.71 | 97.74  | 4.02  |  | 96.33  | 4.64 |  | 0.03                  | 97.35  | 2.44 |
|            | GI <sub>50</sub>      | 1.630  |      | 1.877  |       |  | 3.189  |      |  | GI <sub>50</sub>      | 0.082  |      |
|            | GI <sub>50</sub> (μM) | 5.309  |      | 6.406  |       |  | 10.388 |      |  | GI <sub>50</sub> (μM) | 0.151  |      |
|            |                       |        |      |        |       |  |        |      |  |                       |        |      |
|            | 1                     |        |      | 3      |       |  | 5      |      |  | Adriamycin            |        |      |
|            | Conc.(ug/ml)          | Mean   | SD   | Mean   | SD    |  | Mean   | SD   |  | Conc.(ug/ml)          | Mean   | SD   |
| HCT-15     | 30                    | -20.09 | 5.80 | -24.34 | 5.12  |  | -31.36 | 9.41 |  | 3                     | -13.83 | 4.65 |
|            | 10                    | -5.12  | 9.49 | -0.66  | 5.47  |  | -7.96  | 7.10 |  | 1                     | -8.68  | 4.34 |
|            | 3                     | 26.21  | 4.51 | 30.04  | 2.46  |  | 65.71  | 4.08 |  | 0.3                   | 19.48  | 8.19 |
|            | 1                     | 87.29  | 4.72 | 92.17  | 6.01  |  | 84.54  | 8.37 |  | 0.1                   | 38.73  | 2.13 |
|            | 0.3                   | 100.05 | 3.75 | 99.55  | 3.86  |  | 98.21  | 3.63 |  | 0.03                  | 97.25  | 4.40 |
|            | GI <sub>50</sub>      | 2.040  |      | 2.270  |       |  | 3.290  |      |  | GI <sub>50</sub>      | 0.089  |      |
|            | GI <sub>50</sub> (μM) | 6.644  |      | 7.747  |       |  | 10.717 |      |  | GI <sub>50</sub> (μM) | 0.164  |      |

**Table S1.** Results of the cytotoxicity test of **1,3** and **5**.
